# Supplementary material
Source: Springer Nature journal article supplement (https://www.springermedizin.de/resource/supplementary/12959_2014_226_MOESM6_ESM.pdf/9569300)

### A) Effect of age on VTE recurrence for VKA

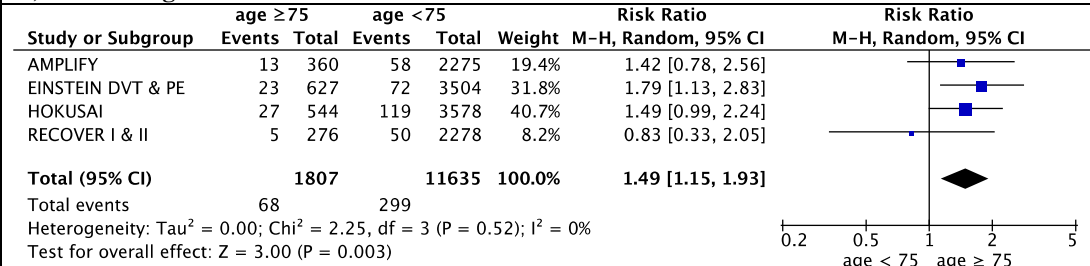

### B) Effect of age on VTE recurrence for NOACs

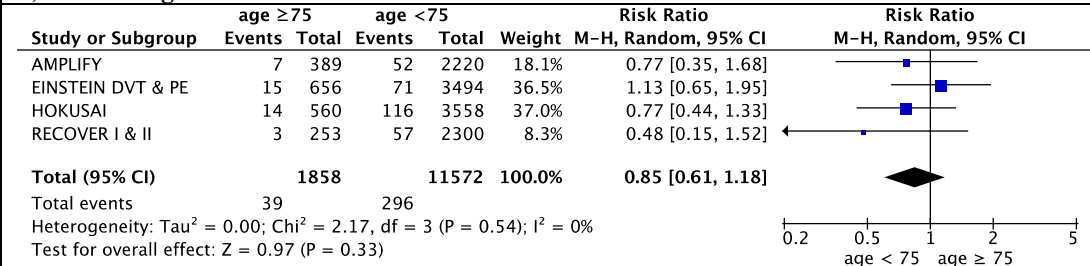

### C) Effect of renal function on VTE recurrence for VKA

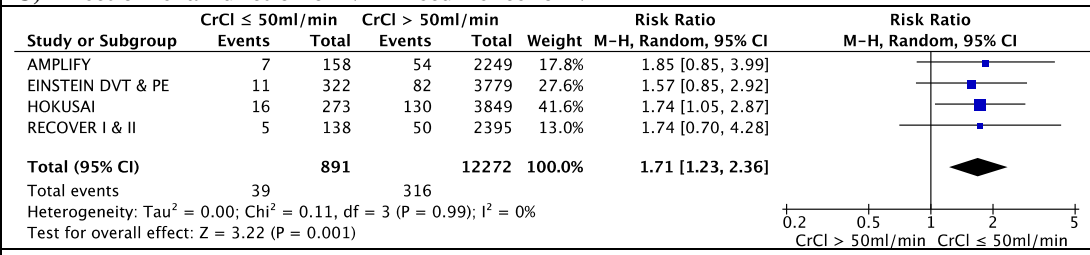

### D) Effect of renal function on VTE recurrence for NOACs

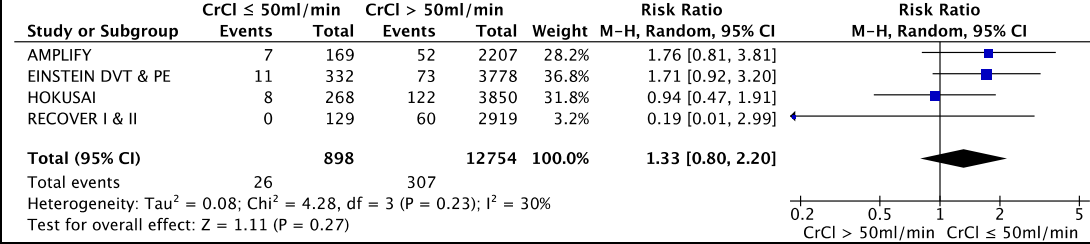

Supplement: MOESM6 [file 9569300]
